# Supplementary material for: O-linked N-acetylglucosamine transferase promotes cervical cancer tumorigenesis through human papillomaviruses E6 and E7 oncogenes
Source: PubMed Central journal article supplement (PMC5190121; doi:10.18632/oncotarget.10112), 2016-06-16
Supplement: oncotarget-07-44596-s001.pdf [file oncotarget-07-44596-s001.pdf]

## O-linked N-acetylglucosamine transferase promotes cervical cancer tumorigenesis through human papillomaviruses E6 and E7 oncogenes

### SUPPLEMENTARY TABLES

Supplementary Table S1: Baseline characteristics of the cervical cancer patients (n=30)

| Variable                       | Value              |
|--------------------------------|--------------------|
| Age (year, median)             | 57.1 (29-84)       |
| <b>FIGO stage</b>              |                    |
| IB2                            | 2 (6.7)            |
| IIA1                           | 4 (13.3)           |
| IIA2                           | 2 (6.7)            |
| IIB                            | 12 (40)            |
| IIIA                           | 2 (6.7)            |
| IIIB                           | 6 (20)             |
| IVA                            | 0                  |
| IVB                            | 2 (6.7)            |
| <b>Histology</b>               |                    |
| Squamous cell carcinoma        | 28 (93.3)          |
| Adenocarcinoma                 | 2 (6.7)            |
| <b>SCC Ag</b>                  | 30.45 (1.3-136.68) |
| <b>Hemoglobin count (g/dL)</b> | 10.5 (8.1-13.3)    |
| <b>Lymph node metastasis</b>   |                    |
| No                             | 10 (33.3)          |
| Yes                            | 16 (53.3)          |
| Unknown                        | 4 (13.3)           |

SCC-Ag: Squamous cell carcinoma antigen

Values are presented as number (%).

FIGO, International Federation of Gynecology and Obstetrics.

Supplementary Table S2: List of primary antibodies used in this study

| Antibody          | Company             | Catalog No. | Dilution      | Applications | Source |
|-------------------|---------------------|-------------|---------------|--------------|--------|
| HPV18E6(G-7)      | Santa Cruz          | sc-365089   | 1:2000, 1:500 | WB,IHC       | Mouse  |
| HPV16E6/18E6      | Santa Cruz          | sc-460      | 1:1000, 1:100 | WB,IHC       | Mouse  |
| HPV18E7(F-7)      | Santa Cruz          | sc-365035   | 1:2000, 1:500 | WB,IHC       | Mouse  |
| HPV16E7           | Santa Cruz          | sc-6981     | 1:1000        | WB           | Mouse  |
| HCF-1             | Bethyl Laboratories | A301-399A   | 1:2000, 1:100 | WB,IP,IHC,IF | Rabbit |
| RL2<br>(O-GlcNAc) | Thermo Scientific   | MA1-072     | 1:2000, 1:100 | WB,IP,IHC    | Mouse  |
| OGT(F-12)         | Santa Cruz          | sc-74546    | 1:2000, 1:500 | WB,IP        | Mouse  |
| OGT(TI-14)        | Sigma               | O6014       | 1:2000, 1:100 | WB, IHC,IF   | Rabbit |
| Anti-FLAG M2      | Sigma               | F1804       | 1:2000, 1:500 | WB,IP        | Mouse  |
| $\beta$ -actin    | Sigma               | A5441       | 1:10000       | WB           | Mouse  |
| Ki-67             | Dako                | M7240       | 1:100         | IHC          | Mouse  |
